# Supplementary material for: Environmental spaces for palsas and peat plateaus are disappearing at a circumpolar scale
Source: Copernicus journal article supplement (doi:10.5194/tc-2022-135), 2022-07-07
Supplement: Supplementary file 2 [file tc-2022-135-supplement-version4.zip]

Archive with 2 entries (2 files):
- Supplementary figures and tables.pdf
- Supplementary materials landform observations.csv
